# Supplementary material for: The Relationship between Anxiety, Subjective and Objective Sleep, Chronotype and Circadian Rhythms with Depressive Symptoms in Insomnia Disorder
Source: MDPI journal article supplement (doi:10.3390/brainsci13040613), 2023-04-04
Supplement: s1 [file s1]

[illegible]

---

on

---

**Table S1.** Correlations between subjective and objective variables. Key: Depressive symptoms – PHQ-9; Sleep quality - PSQI; Circadian preference - CSM; Dysfunctional beliefs - DBAS; Anxiety - GAD-7; DLMO – dim light melatonin onset; TST – total sleep time<sup>a</sup> (diary); SOL – sleep onset latency<sup>a</sup> (diary); WASO<sup>a</sup> – wake after sleep onset (diary); ); PSG – polysomnography; Phase HBT; habitual bedtime sleep diary-DLMO; \* p<0.05; ^ p<0.001.
